# Supplementary material for: Basicity, complexation ability and interfacial behavior of BTBPs: a simulation study
Source: Royal Society of Chemistry journal article supplement (doi:10.1039/c0cp01975e), 2010-12-16
Supplement: c0cp01975e.pdf [file c0cp01975e.pdf]

**Table S1:** Total energies of BTBPs (**L**) neutral, protonated and complexed (in hartrees).

| <b>R</b>          | <b>X</b>         | <b>L</b> <i>c-g-c</i> | <b>L</b> <i>t-t-t</i> <sup>a)</sup> | <b>LH</b> <sup>+</sup> <i>c-c-c</i> | <b>LH</b> <sup>+</sup> <i>t-t-t</i> <sup>b)</sup> | Eu(NO <sub>3</sub> ) <sub>3</sub> <b>L</b> |
|-------------------|------------------|-----------------------|-------------------------------------|-------------------------------------|---------------------------------------------------|--------------------------------------------|
| H                 | H                | -1053.6544            | -1053.6718                          | -1054.0741                          | -1054.0638                                        | -1930.1810                                 |
| H                 | <sup>t</sup> But | -1210.9223            | -1210.9398                          | -1211.3488                          | -1211.3394                                        | -2087.4480                                 |
| Et                | H                | -1368.2181            | -1368.2367                          | -1368.6488                          | -1368.6397                                        | -2244.7489                                 |
| Et                | <sup>t</sup> But | -1525.4857            | -1525.5045                          | -1525.9226                          | -1525.9139                                        | -2402.0154                                 |
| CyMe <sub>4</sub> | H                | -1680.3353            | -1680.3537                          | -1680.7668                          | -1680.7571                                        | -2556.8601                                 |
| CyMe <sub>4</sub> | <sup>t</sup> But | -1837.6030            | -1837.6217                          | -1838.0403                          | -1838.0313                                        | -2714.1267                                 |

a): For **L** *c-t-c* (**R** = CyMe<sub>4</sub>, **X** = H), E = -1680.3507 hartrees.

b): For **LH**<sup>+</sup> *c-t-c* (**R** = CyMe<sub>4</sub>, **X** = H), E = -1680.7602 hartrees.

**Table S2:** Total energies of BTPHens (**L**) neutral, protonated and complexed (in hartrees).

| <b>R</b>          | <b>X</b>         | <b>L</b>   | <b>LH</b> <sup>+</sup> | Eu(NO <sub>3</sub> ) <sub>3</sub> <b>L</b> |
|-------------------|------------------|------------|------------------------|--------------------------------------------|
| H                 | H                | -1129.8871 | -1130.3077             | -2006.4153                                 |
| H                 | <sup>t</sup> But | -1287.1382 | -1287.5673             | -2163.6719                                 |
| Et                | H                | -1444.4509 | -1444.8826             | -2320.9807                                 |
| Et                | <sup>t</sup> But | -1601.7019 | -1602.1411             | -2475.2370                                 |
| CyMe <sub>4</sub> | H                | -1756.5684 | -1757.0007             | -2633.0943                                 |
| CyMe <sub>4</sub> | <sup>t</sup> But | -1913.8258 | -1914.2647             | -2790.3508                                 |

**Table S3:** Eu(NO<sub>3</sub>)<sub>3</sub>(**L**) complexes with **L** = BTBP and BTPhen: Optimized distances (in Å) and Mulliken charges of Eu.

| <b>R</b>          | <b>X</b>         | $\phi$ (°) <sup>a)</sup> |                   | Eu-N and Eu-O Distances (Å) |                    |                    |                    |                    |                    |                    |                    |                    |                    | Eu Charge (e)      |                    |
|-------------------|------------------|--------------------------|-------------------|-----------------------------|--------------------|--------------------|--------------------|--------------------|--------------------|--------------------|--------------------|--------------------|--------------------|--------------------|--------------------|
|                   |                  | BTBP                     | BTPhen            | BTBP                        |                    |                    |                    |                    | BTPhen             |                    |                    |                    |                    | BTBP               | BTPhen             |
|                   |                  |                          |                   | N <sub>1</sub>              | N <sub>2</sub>     | N <sub>3,4</sub>   | O <sub>ax</sub>    | O <sub>eq</sub>    | N <sub>1</sub>     | N <sub>2</sub>     | N <sub>3,4</sub>   | O <sub>ax</sub>    | O <sub>eq</sub>    |                    |                    |
| H                 | H                | -9.4                     | 0.1               | 2.68                        | 2.68               | 2.60               | 2.53               | 2.44               | 2.67               | 2.67               | 2.62               | 2.53               | 2.44               | 1.35               | 1.34               |
| H <sup>b)</sup>   | H <sup>b)</sup>  | -0.2 <sup>b)</sup>       | 0.2 <sup>b)</sup> | 2.59 <sup>b)</sup>          | 2.59 <sup>b)</sup> | 2.59 <sup>b)</sup> | 2.57 <sup>b)</sup> | 2.50 <sup>b)</sup> | 2.60 <sup>b)</sup> | 2.60 <sup>b)</sup> | 2.62 <sup>b)</sup> | 2.57 <sup>b)</sup> | 2.51 <sup>b)</sup> | 1.34 <sup>b)</sup> | 1.31 <sup>b)</sup> |
| H                 | <sup>t</sup> But | -11.2                    | 0.1               | 2.68                        | 2.66               | 2.61               | 2.54               | 2.45               | 2.66               | 2.66               | 2.60               | 2.54               | 2.45               | 1.34               | 1.35               |
| Et <sup>c)</sup>  | H                | -5.7                     |                   | 2.61                        | 2.60               | 2.60               | 2.54               | 2.49               |                    |                    |                    |                    |                    |                    |                    |
| Et                | H                | -4.7                     | 0.1               | 2.66                        | 2.66               | 2.58               | 2.54               | 2.46               | 2.67               | 2.67               | 2.61               | 2.54               | 2.45               | 1.34               | 1.33               |
| Et                | <sup>t</sup> But | -8.1                     | 0.1               | 2.67                        | 2.65               | 2.59               | 2.54               | 2.46               | 2.66               | 2.66               | 2.60               | 2.54               | 2.46               | 1.34               | 1.33               |
| CyMe <sub>4</sub> | H                | 1.2                      | 0.1               | 2.66                        | 2.66               | 2.58               | 2.54               | 2.46               | 2.66               | 2.66               | 2.60               | 2.54               | 2.46               | 1.34               | 1.34               |
| CyMe <sub>4</sub> | <sup>t</sup> But | 8.6                      | 0.2               | 2.65                        | 2.67               | 2.58               | 2.54               | 2.47               | 2.65               | 2.65               | 2.59               | 2.54               | 2.47               | 1.34               | 1.34               |

a: Defined in Scheme 2.

b: in PCM -water

c: X-ray structure (ref 19).

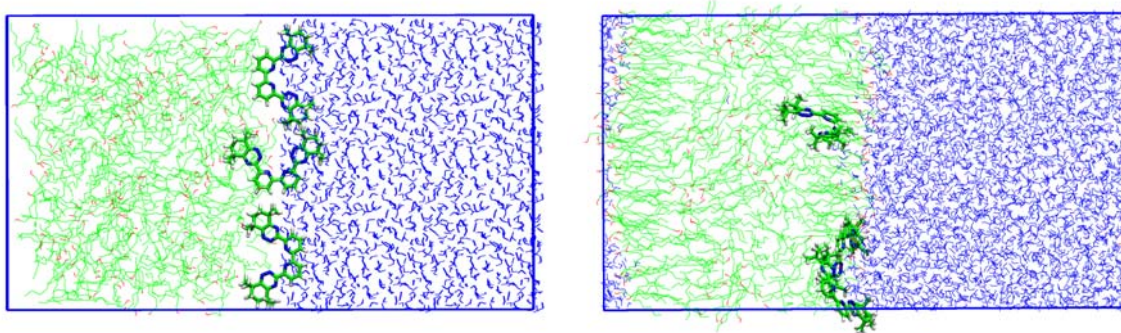

**Figure S1:** 3 *cis-cis-cis* (*c-c-c*) CyMe<sub>4</sub>BTBP (**L**) at the Oct-Hex / water interface. Left: initial position. Right: after 2 ns of dynamics.

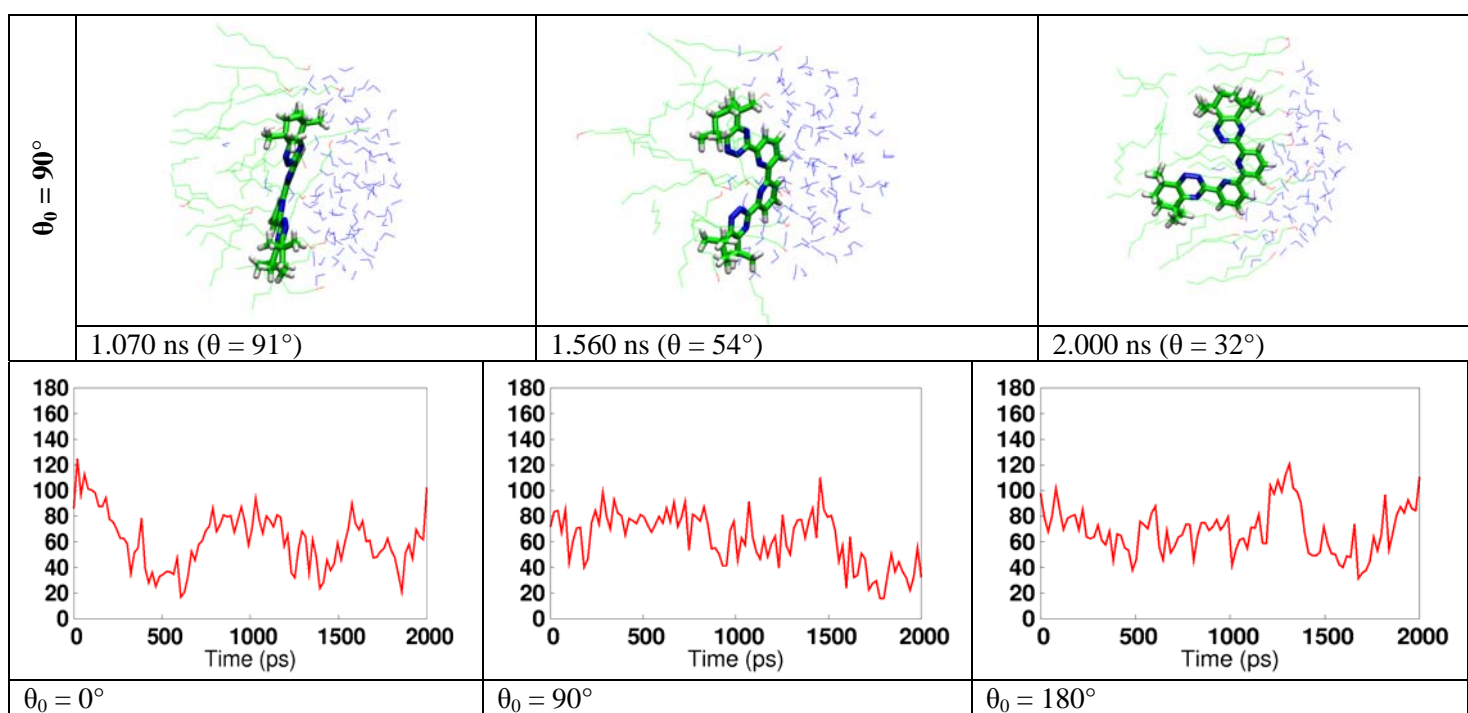

**Figure S2:** Snapshots of *c-c-c* **L** during the dynamics (top) and evolution of orientation ( $\theta$  angle, see Scheme 3) with time for different initial positions (bottom).

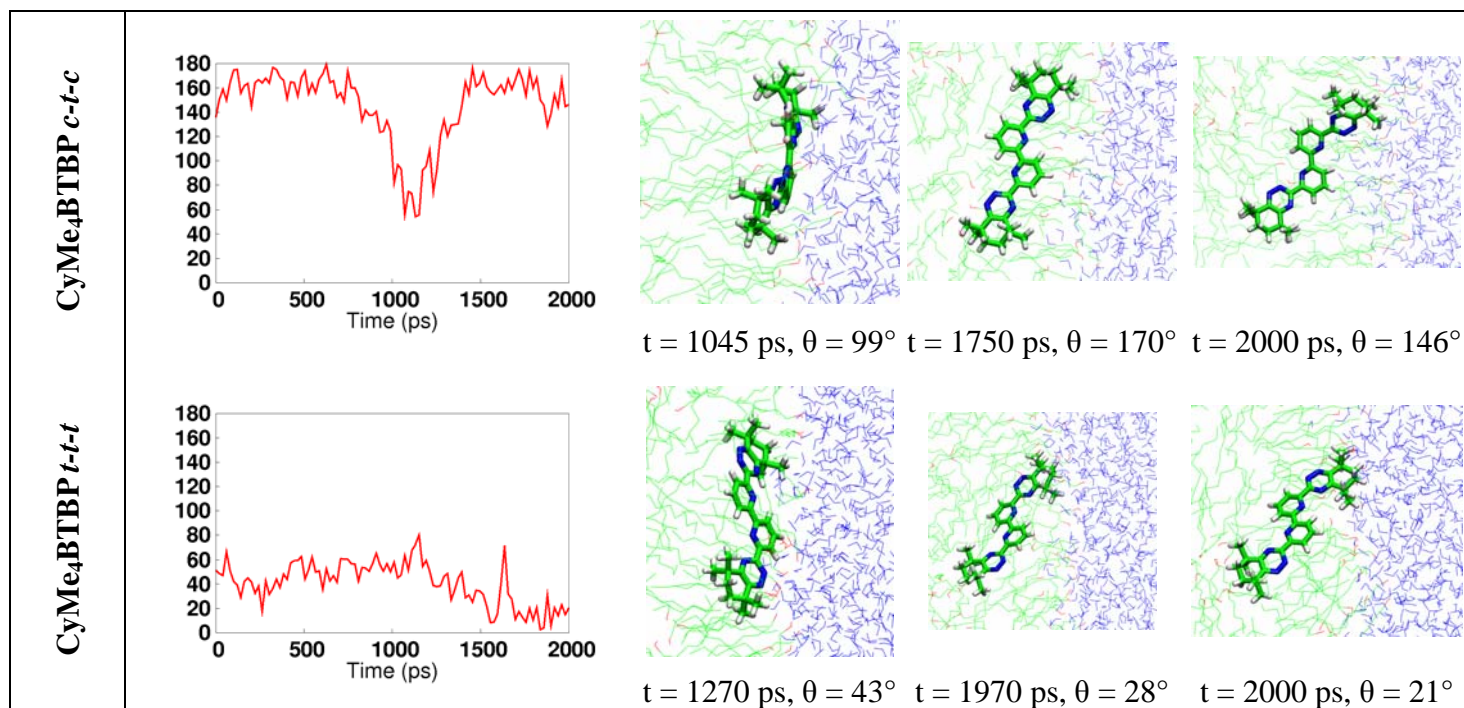

**Figure S3:** Orientation and snapshots of **L** with *c-t-c* and *t-t-t* conformations with time at the Oct-Hex/water interface.

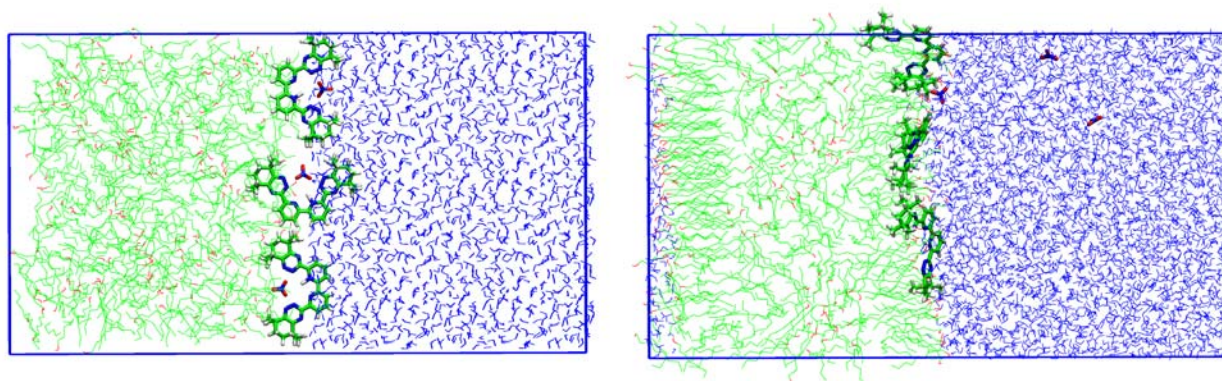

**Figure S4:** 3 *cis-cis-cis* (*c-c-c*) CyMe<sub>4</sub>BTBPH<sup>+</sup> (**LH**<sup>+</sup>) at the Oct-Hex / water interface. Left: initial position. Right: after 2 ns of dynamics.

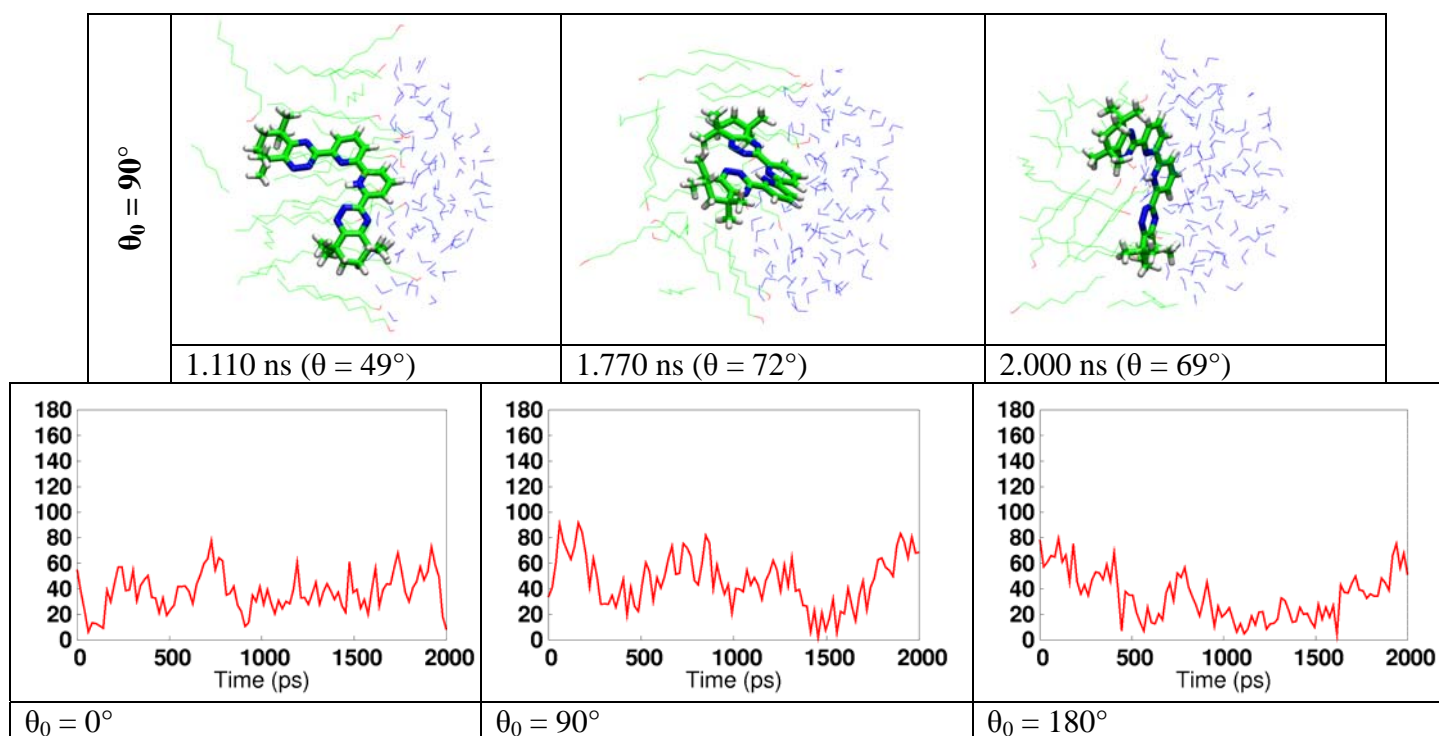

Figure S5: Snapshots of *c-c-c* LH<sup>+</sup> during the dynamics (top) and evolution of orientation ( $\theta$  angle, see Scheme 3) with time for different initial positions (bottom).

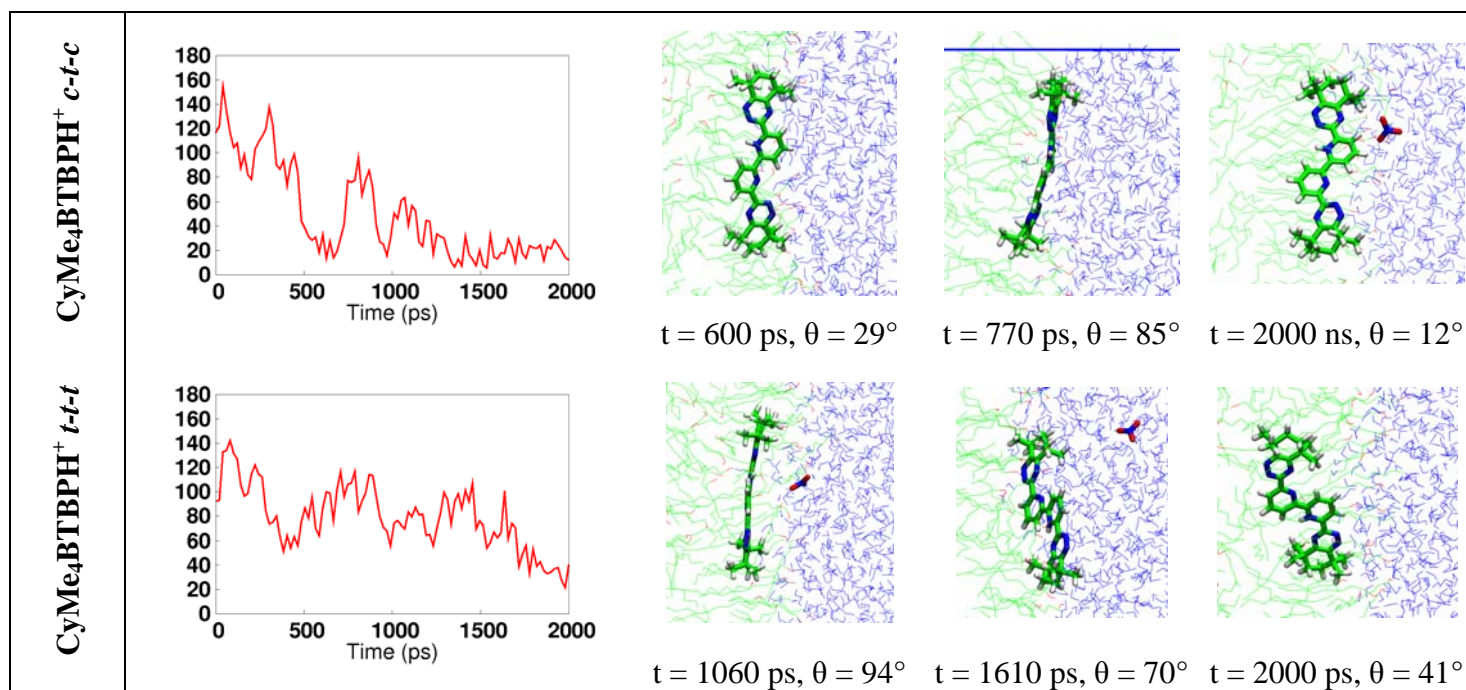

Figure S6: Orientation ( $\theta$  angle, see Scheme 3) and snapshots of LH<sup>+</sup> with *c-t-c* and *t-t-t* conformations with time at Oct-Hex/water interface.

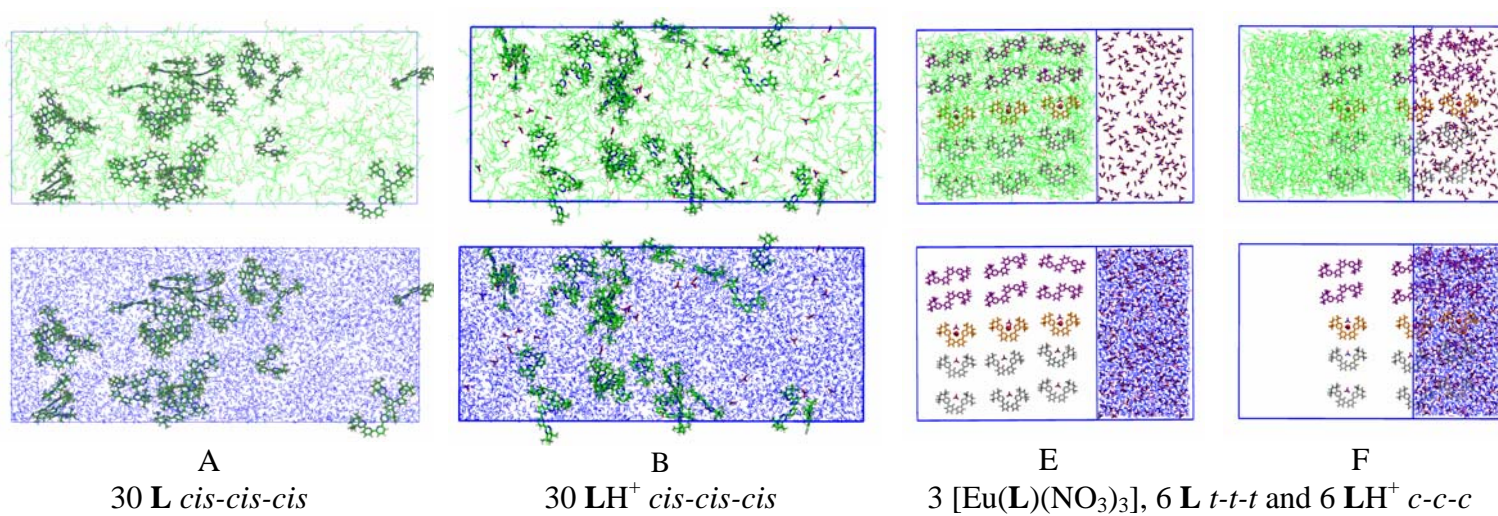

**Figure S7:** Initial positions of concentrated systems with mixed liquids (A and B) and juxtaposed phases (E and F). Solvents shown separately in two lines for clarity: octanol+hexane in green (top) and water in blue (bottom).

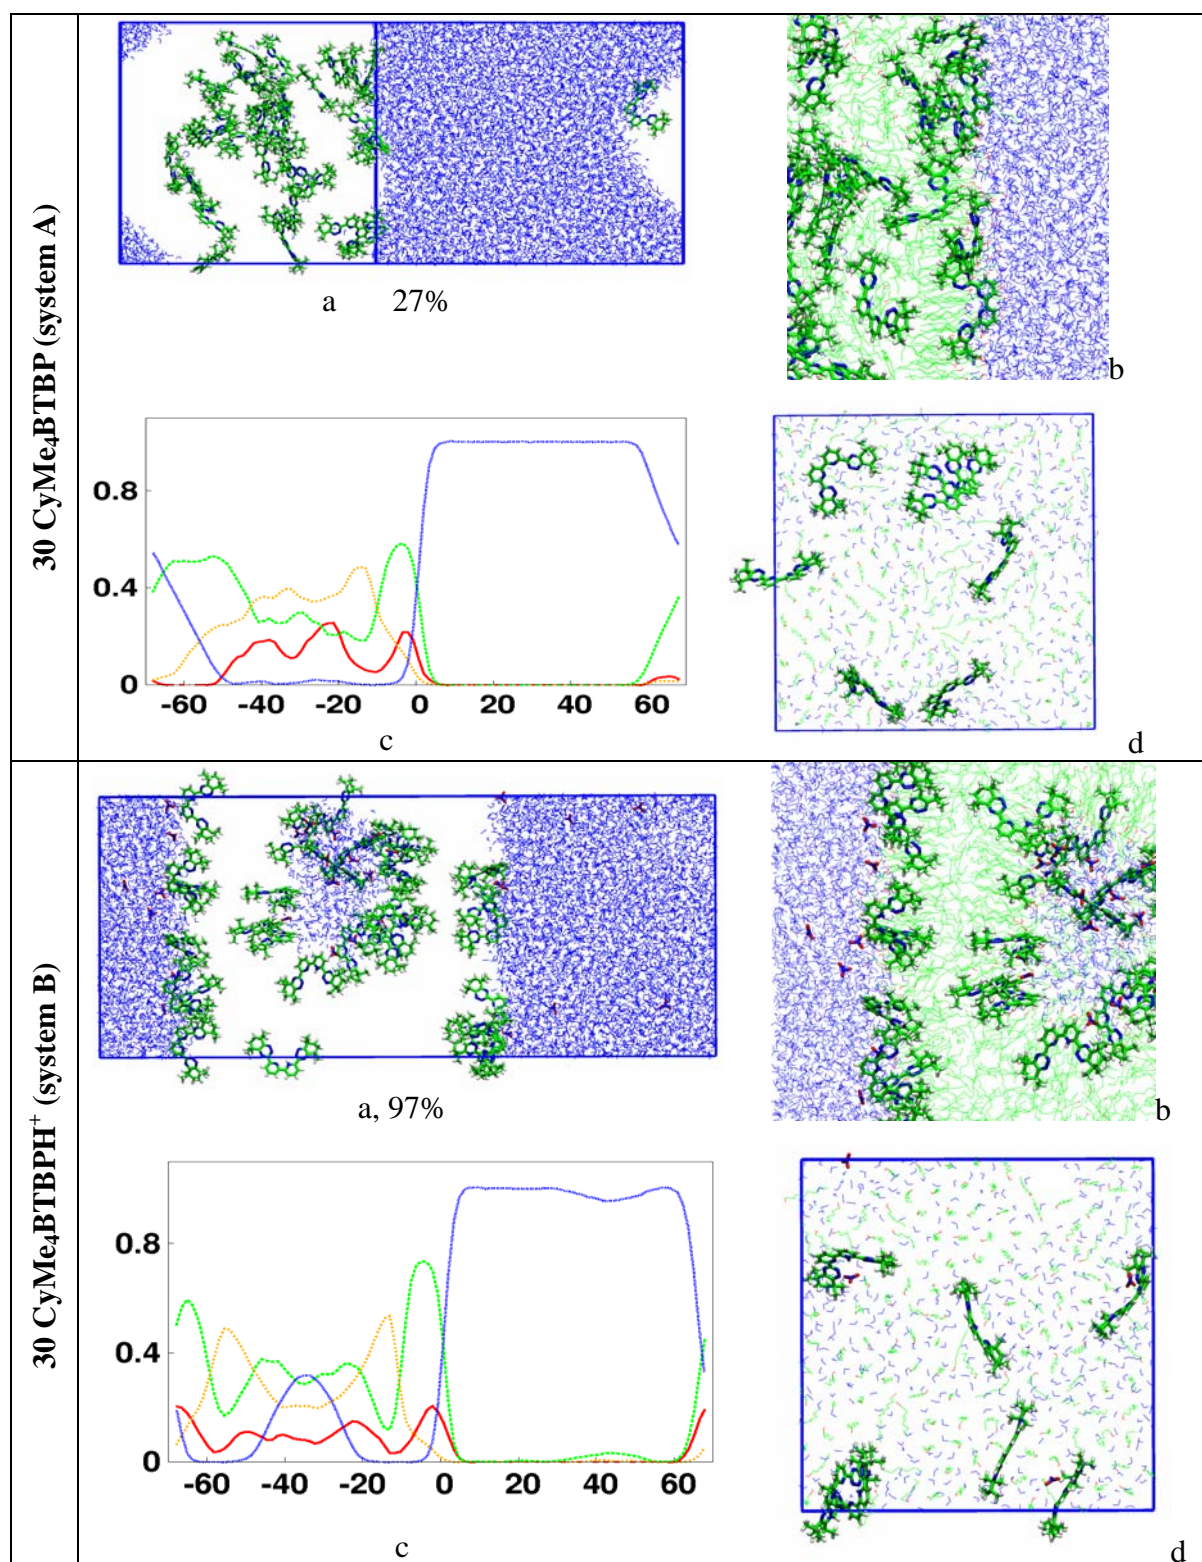

**Figure S8:** 30 *c-c-c* CyMe<sub>4</sub>BTBP and 30 *c-c-c* CyMe<sub>4</sub>BTBPH<sup>+</sup> in the OCT-HEX/Water mixture. a: Snapshot at the end of the demixing simulations ("oil" phase hidden for clarity). b: Zoom on the interface. c: Density curves of BTBP (red), octanol (green), hexane (orange) and water (blue) and percentage of BTBP within 5 Å of the interface (average during the last 0.5 ns of dynamics). d: View of the interface (XY slice with  $\Delta Z = 10 \text{ \AA}$ ).

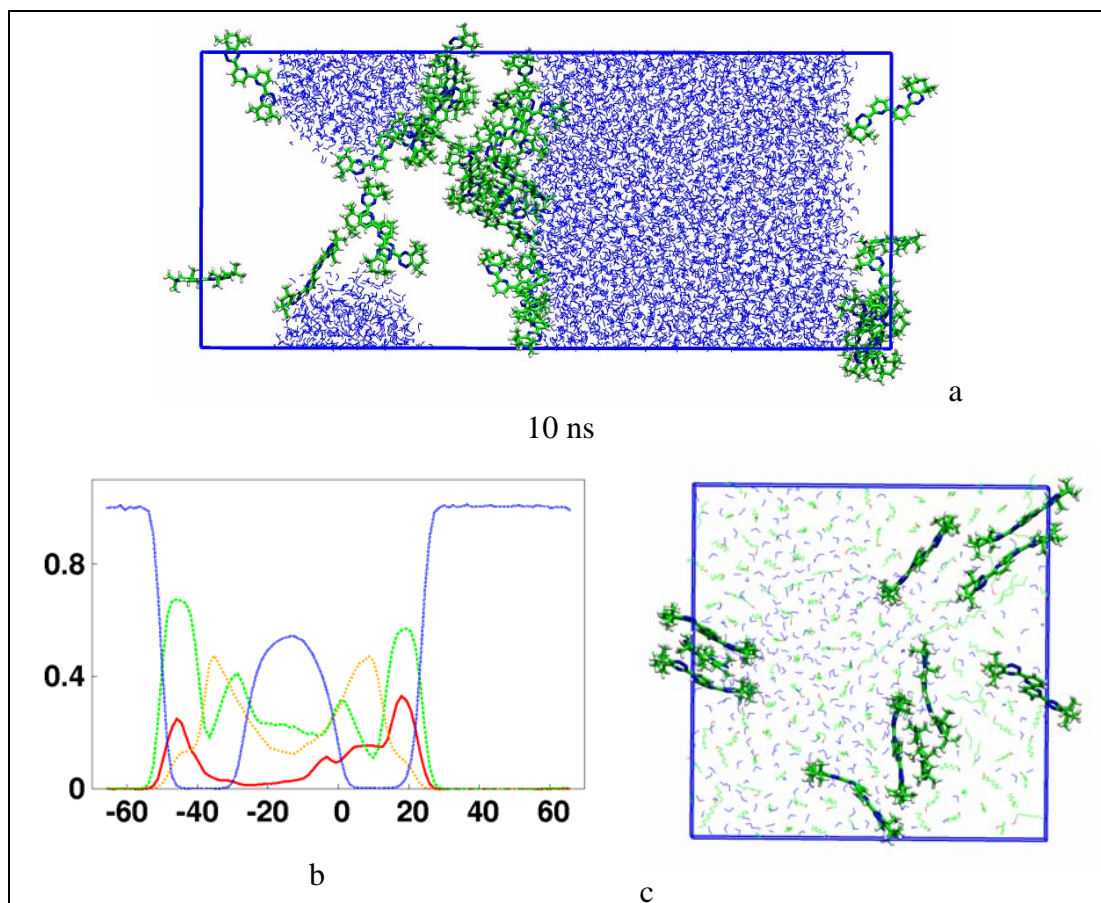

Figure S9: 30 *t-t-t* CyMe<sub>4</sub>BTBP in OCT-HEX/Water solution (DEMIX). *a*: Snapshot at the end of the simulations, ("oil" phase is not shown for clarity). *b*: Density curves of BTBP (red), octanol (green), hexane (orange) and water (blue), average during the last 0.5 ns of dynamics. *c*: View of the interface.

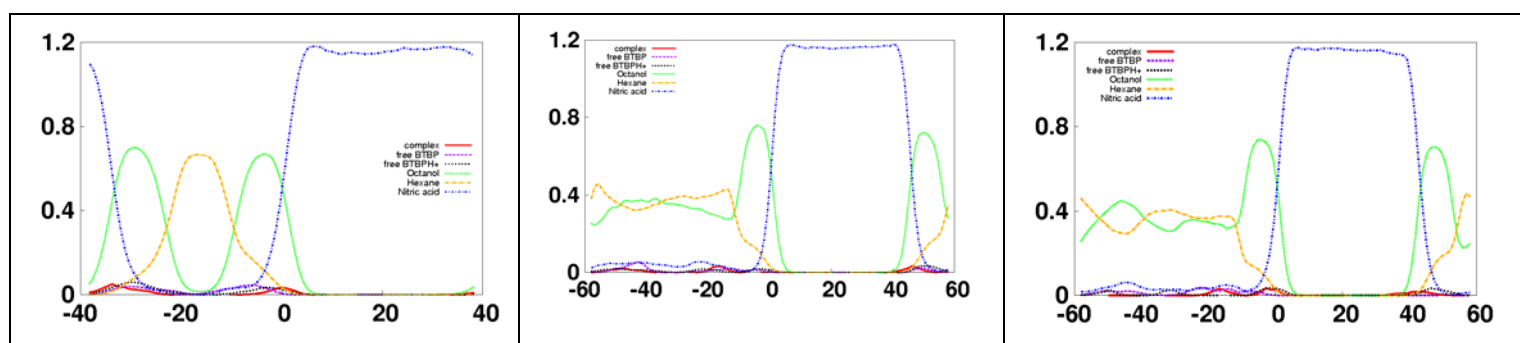

Figure S10: Density curves of systems C (left), E (middle) and F (right), average over the last ns of dynamics (complex in red, neutral BTBP in purple, protonated BTBP in gray, octanol in green, hexane in orange, aqueous phase in blue).

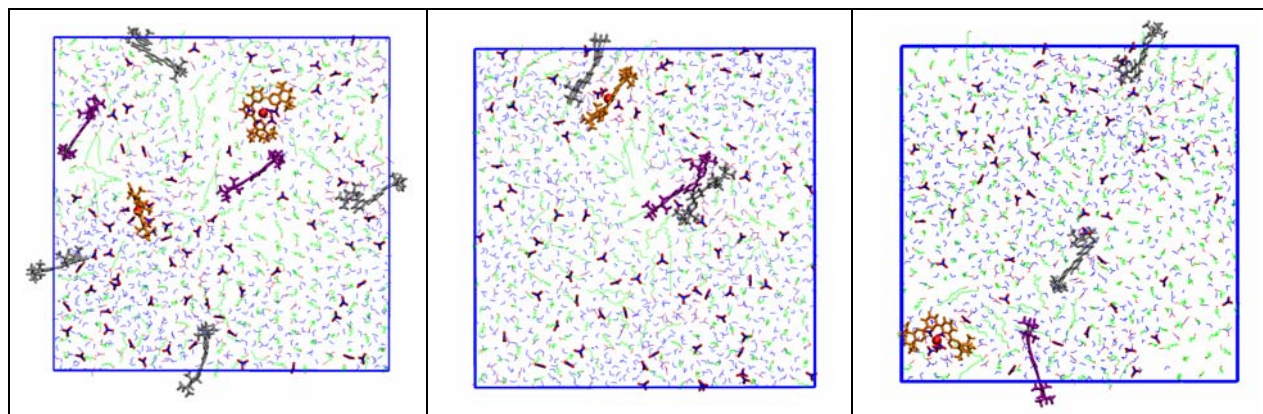

**Figure S11:** View of the interface (XY slice with  $\Delta Z = 10 \text{ \AA}$ ) of systems C (left), E (middle) and F (right) at the end of the dynamics.

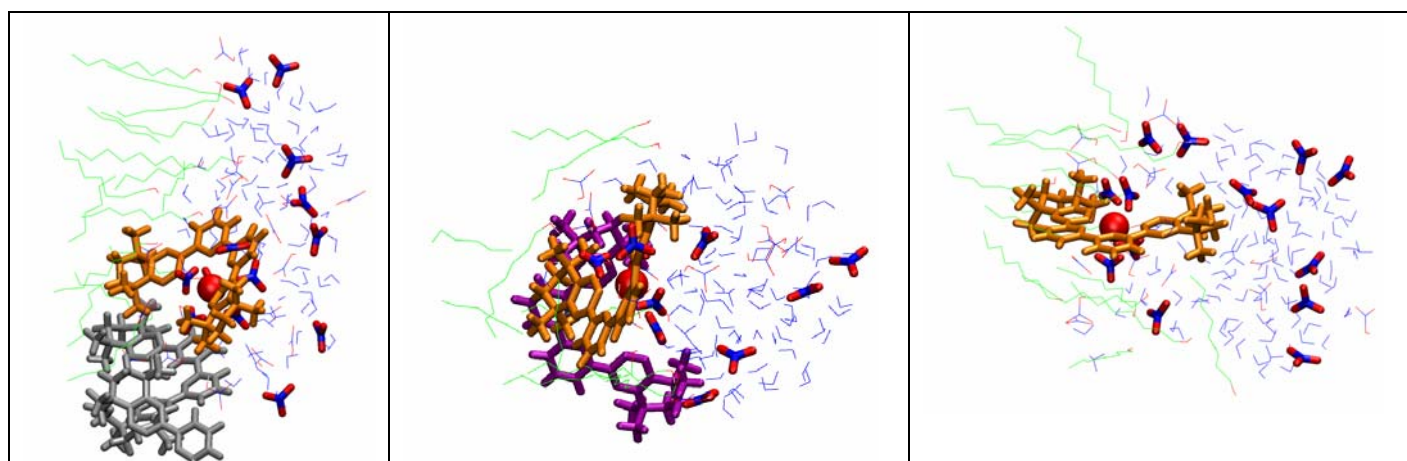

**Figure S12:** Snapshots of the complexes and their environment in system C.
